# Supplementary material
Source: Springer Nature journal article supplement (https://www.springermedizin.de/resource/supplementary/12913_2010_1878_MOESM2_ESM.pdf/9529168)

Counsellors' perspectives on....

Categories describing meaning units

Themes describing manifest meaning

Becoming a counsellor

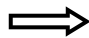

- Concern for humanity
- Delegated to serve
- Desire for skills

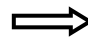

Counselling is a call to serve humanity

The training

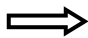

- Building foundation
- An 'eye-opener'
- A 'crash' course

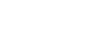

Good training and devotion breed competence

Counselling experience

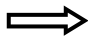

- Respect for humanity
- Consolidating skills
- Sensitive to patients' needs



Team work amidst adversity is the recipe for success

TB/HIV collaboration

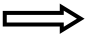

- Giving a helping hand
- Building networks

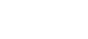

Facing challenges

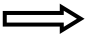

- Engaging patients
- Engaging the community

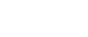

Supplement: MOESM2 [file 9529168]
